# Supplementary material for: Post-flowering biotic and abiotic stresses impact nitrogen use efficiency and seed filling in Arabidopsis thaliana
Source: PubMed Central journal article supplement (PMC7382380; doi:10.1093/jxb/eraa011), 2020-01-13
Supplement: eraa011_suppl_supplementary_table_s1_figure_s1-s4.pdf [file eraa011_suppl_supplementary_table_s1_figure_s1-s4.pdf]

**Supplemental Table S1: List of selected genotypes and their seed composition.**

| <b>Name</b> | <b>N%</b> | <b>C%</b> | <b>C:N ratio</b> |
|-------------|-----------|-----------|------------------|
| 7           | 3.57      | 55.45     | 15.5             |
| 63          | 3.80      | 55.12     | 14.5             |
| 83          | 3.57      | 55.51     | 15.6             |
| 134         | 3.71      | 53.82     | 14.5             |
| 359         | 3.48      | 55.97     | 16.1             |
| 397         | 3.63      | 55.18     | 15.2             |
| 401         | 3.92      | 54.52     | 13.9             |
| 442         | 4.25      | 53.73     | 13.3             |

Data recorded from Chardon *et al.* (2014).

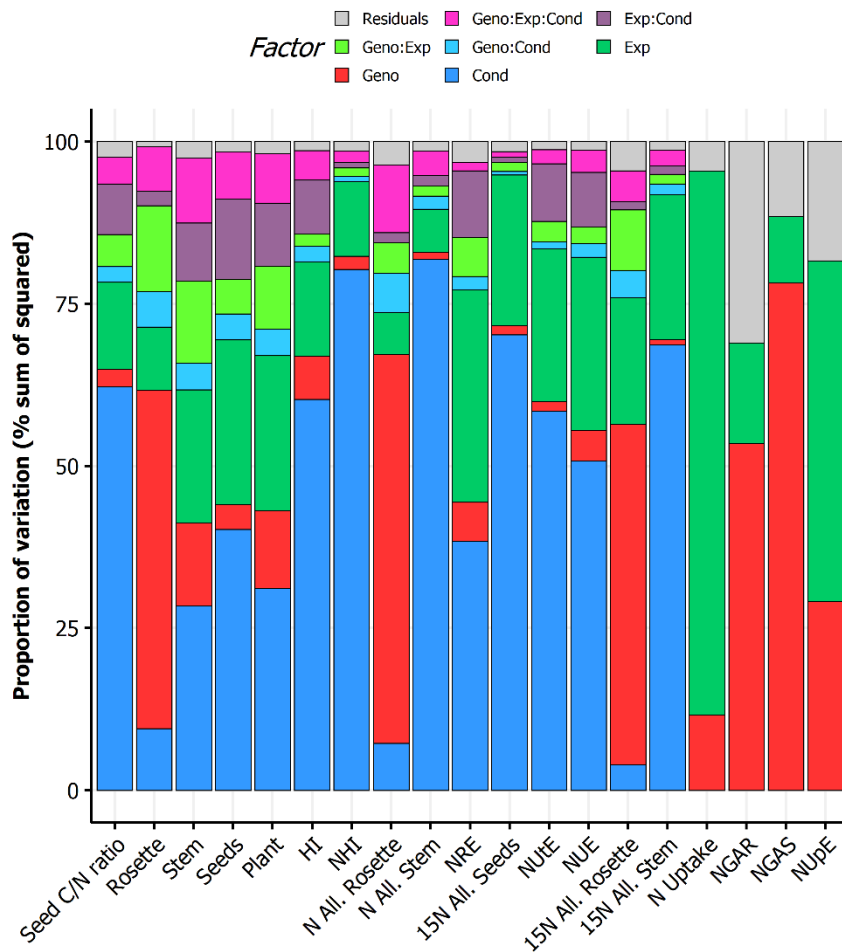

**Figure S1: Proportion of variance explained by factors and interactions in ANOVA.** Histograms show the effects due to genotype (Geno), condition (Cond) and experiment (Exp), and interactions as a percentage of the variation. Traits analyzed are C/N ratio in seeds (Seed C/N ratio), DW of rosette (Rosette), DW of stem (Stem), DW of seeds (Seeds), DW of the whole plant (Plant), harvest index (HI), N harvest index (NHI Seeds), N allocation to rosette (N All. Rosette), N allocation to stem (N All. Stem), N remobilization efficiency (NRE), <sup>15</sup>N allocation to seeds (15N All. Seeds), N utilization efficiency (NutE), N use efficiency (NUE), <sup>15</sup>N allocation to rosette (15N All. Rosette), <sup>15</sup>N allocation to stem (15N All. Stem), N uptake, N gain allocated to rosette (NGAR), N gain allocated to stem (NGAS), N uptake efficiency (NUPE).

**A**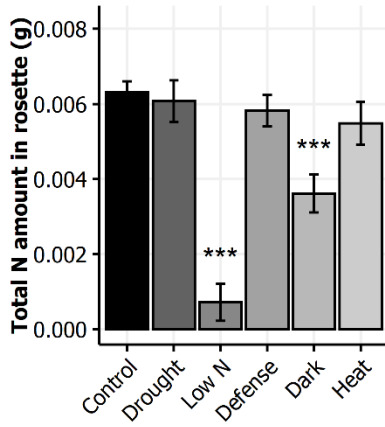**B**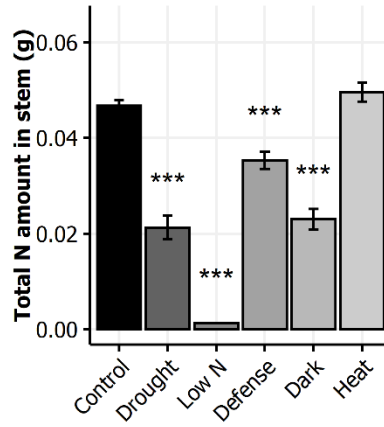**C**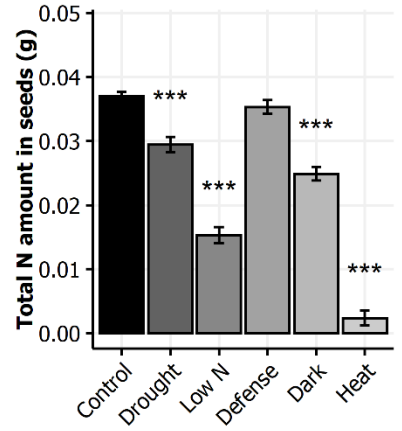

**Figure S2:** N quantity in rosette, stem and seeds of plants grown in the 6 environments. The mean  $\pm$  s.e. of the eight genotypes are shown. Stars indicate the significance of the difference between the means of the control and of the stress conditions: \*  $P < 0.05$ , \*\*  $P < 0.01$ , \*\*\*,  $P < 0.001$ ,  $n \geq 112$ .

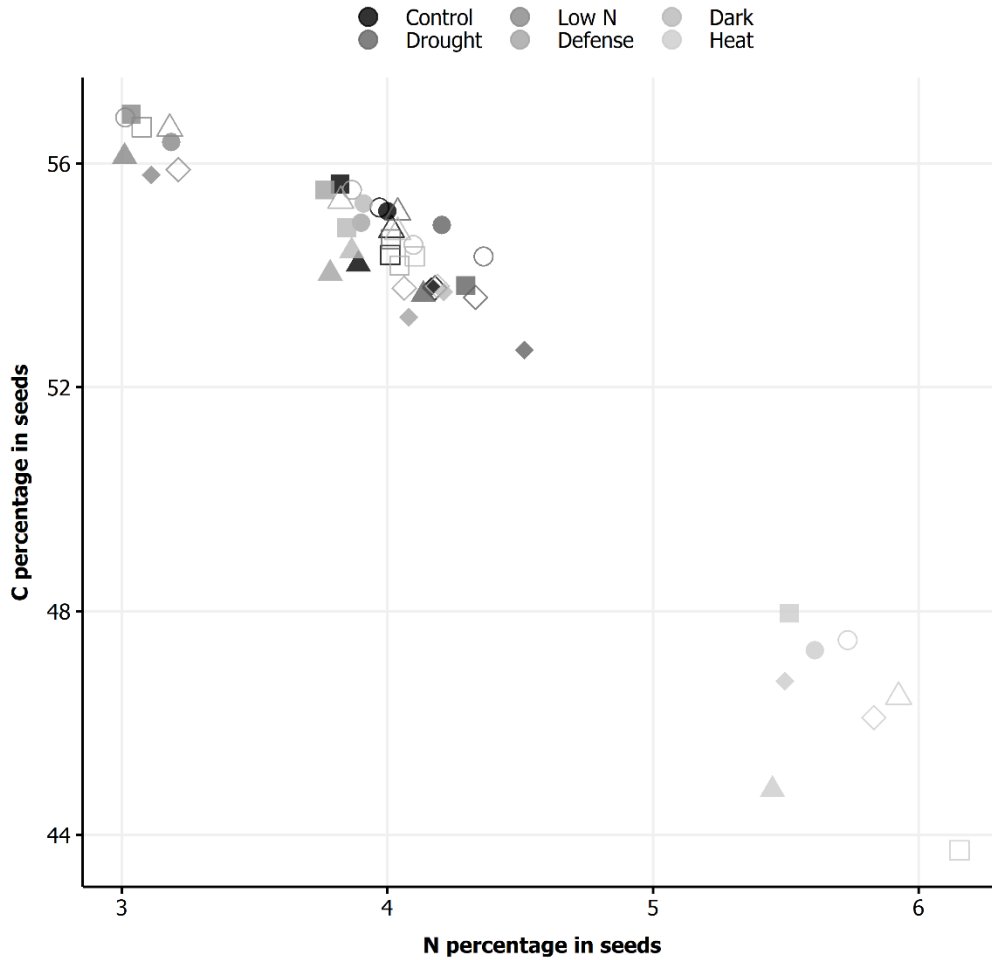

**Figure S3: Means of seeds composition of genotypes in the 6 conditions.** The plots are colored in a range of grey, from black for the control condition to light grey for the heat condition. Each genotype is shown by the same plot shape in the 6 conditions: 7, square; 63, circle; 83, triangle; 134, filled diamond; 359, filled square; 397, filled circle; 401, filled triangle; 442, filled diamond.

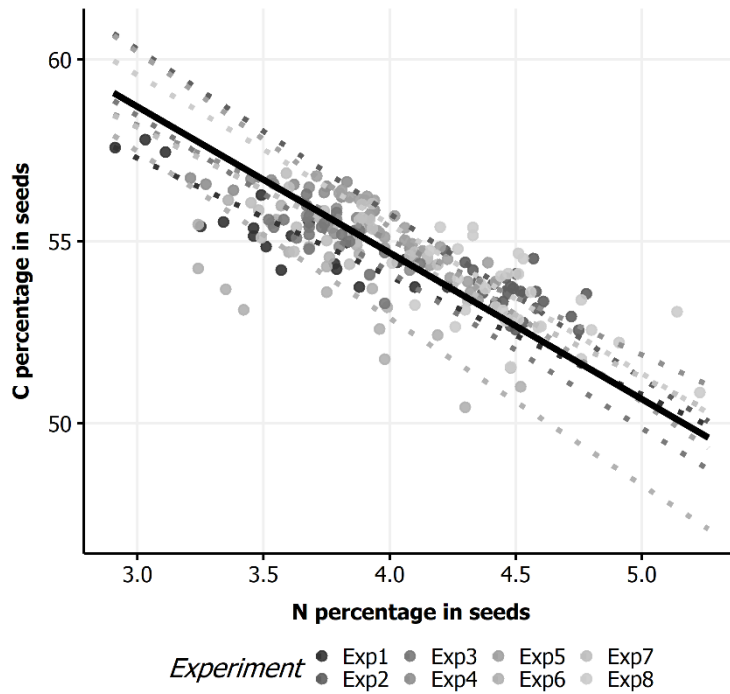

**Figure S4: Relationship between seed N% and C% of plants grown in the control condition in 8 independent experiments.** Dotted grey lines are the orthogonal regression lines in the 8 experiments. Dark line shows the regression line with average parameters.
